# Supplementary material for: VEGF-C is a trophic factor for neural progenitors in the vertebrate embryonic brain
Source: Springer Nature journal article supplement (doi:10.1038/nn1646), 2006-02-05
Supplement: 41593_2006_BFnn1646_MOESM1_ESM.pdf [file 41593_2006_BFnn1646_MOESM1_ESM.pdf]

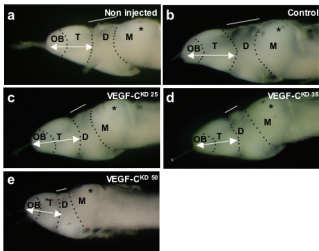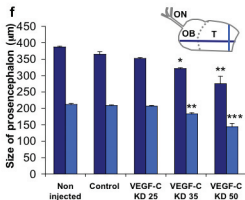

**Supplementary Figure 1. VEGF-C requirement for neural development in *Xenopus* tadpoles.**

(a-e) Lateral view of microdissected brains from non-injected (a), control morpholino injected (b) and VEGF-C<sup>KD</sup> *Xenopus* tadpoles (c-e). VEGF-C<sup>KD</sup> 25, 35, 50: 25, 35, 50 ng of antisense VEGF-C morpholino injected. OB: olfactory bulb, T: telencephalon, D: diencephalon, M: mesencephalon. Note dose-dependent decrease in the length of the olfactory bulb and telencephalon (white arrow), diencephalon (white dash) and tectal vesicles (asterisk). Scale bar: 0.2 mm. (f) Quantification of the effect of control- and antisense VEGF-C-morpholino injections on the morphology of the prosencephalon (olfactory bulb and telencephalon). The rostral-caudal (blue) and medio-lateral (light blue) extension of the prosencephalon was measured on dorsal views of dissected brains (magnification 5x), as shown in the schematic drawing, using ImageJ software. Number of animals for each condition:  $n = 4 \pm 1$ . Columns represent the mean  $\pm$  sem of prosencephalic length or width (Mann-Whitney U-test; \* $P < .05$ , \*\* $P < .01$ , \*\*\* $P < .001$ ).
